# Supplementary material
Source: publisher figshare collection journal article supplement (https://tandf.figshare.com/ndownloader/files/16263332)
Supplement: Supplementary file 1 [file 16263332]

**SUPPORTING INFORMATION**

**Ternary Adsorbent Photocatalyst Hybrid (APH) Nanomaterials for Improved Abstraction of Tetracycline from Water**

Sammar Minallah*a*, Erum Pervaiz*a**, Usman Yousaf *a*, M. Bilal Khan Niazi*a*, Liu Honghongb and Minghui Yangb*

*a* Department of Chemical Engineering, School of Chemical & Materials Engineering (SCME), National University of Sciences & Technology (NUST), Sector H-12 Islamabad, 44000, Pakistan.

*b* Solid State functional Materials Research Lab, Ningbo Institute of Materials Technology and Engineering (NIMTE), Chinese Academy of Sciences (CAS), 315201, Ningbo China.

**M. Yang** email*: [myang@nimte.ac.cn](mailto:myang@nimte.ac.cn)

**Erum Pervaiz** email*:erum.pervaiz@scme.nust.edu.pk

**Address**:

Department of Chemical Engineering, School of Chemical & Materials Engineering (SCME), National University of Sciences & Technology (NUST), Sector H-12 Islamabad, 44000, Pakistan.

Solid State functional Materials Research Lab, Ningbo Institute of Materials Technology and Engineering (NIMTE), Chinese Academy of Sciences (CAS), 315201, Zhungguan west road, Ningbo, PR. China


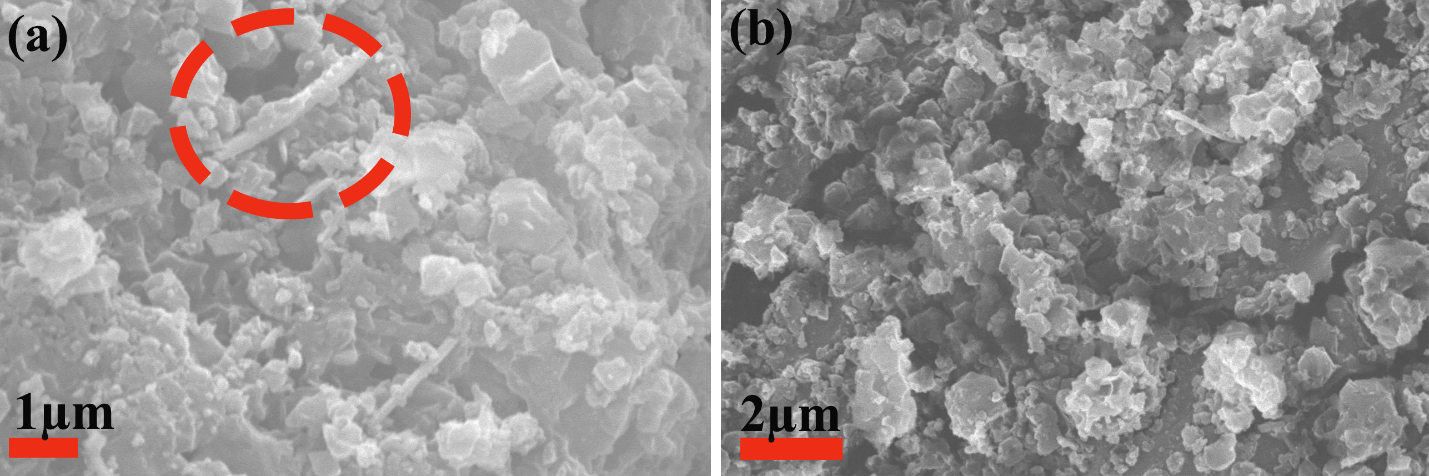


**Fig. S1** SEM images of (a) CMZ-1 nanohybrid (b) SEM image of CMZ-4 nanohybrid


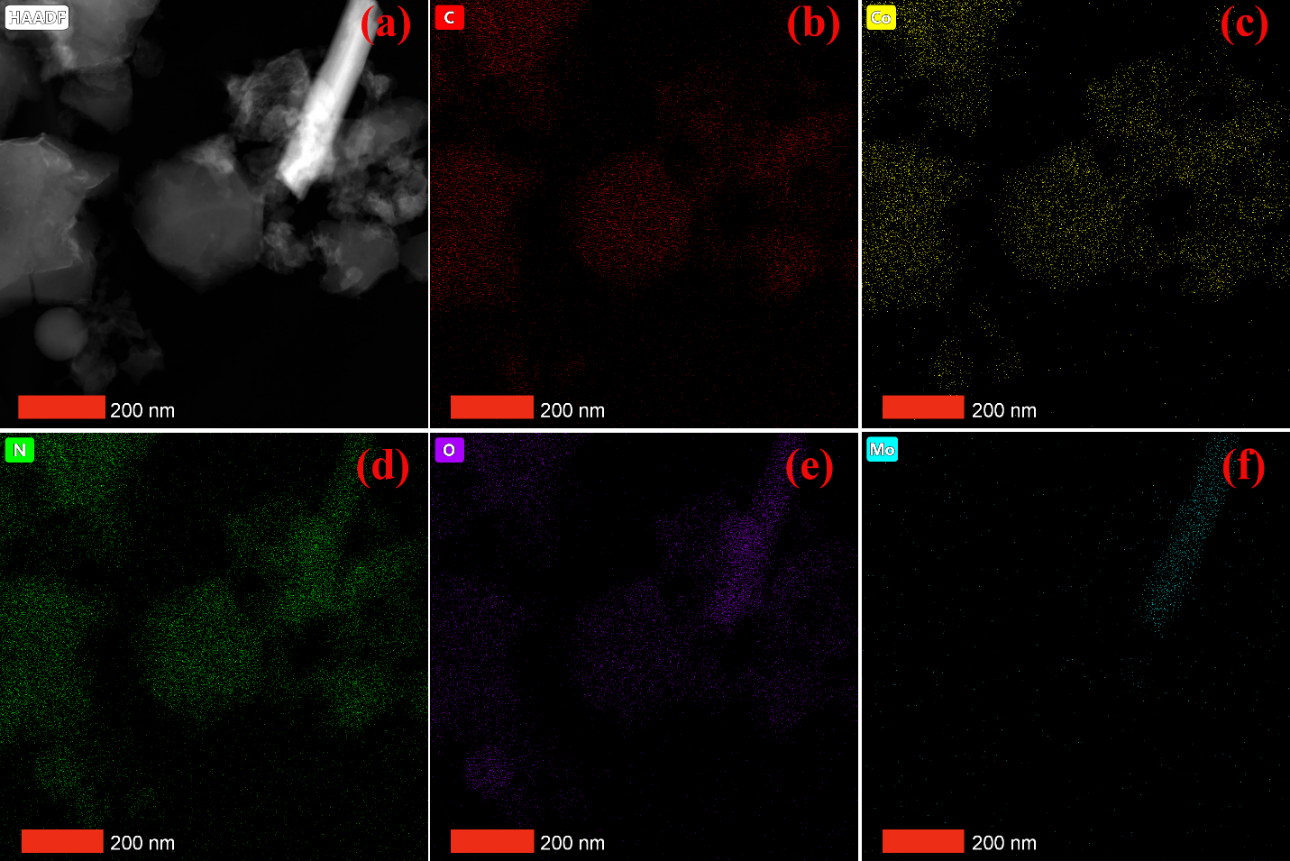


**Fig. S2** HAADF images of CMZ-3 showing elemental mapping for C, Co, N, O, Mo


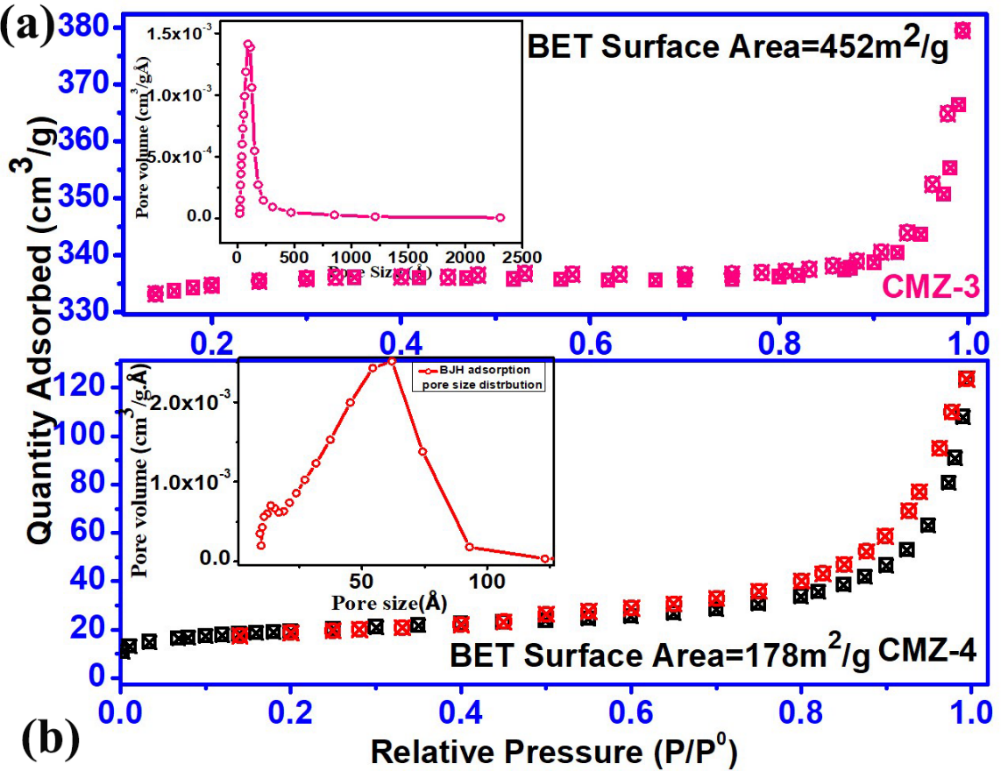


**Fig. S3** N2 adsorption-desorption isotherms for CMZ-3 and CMZ-4 nanohybrids (inset) pore size distribution


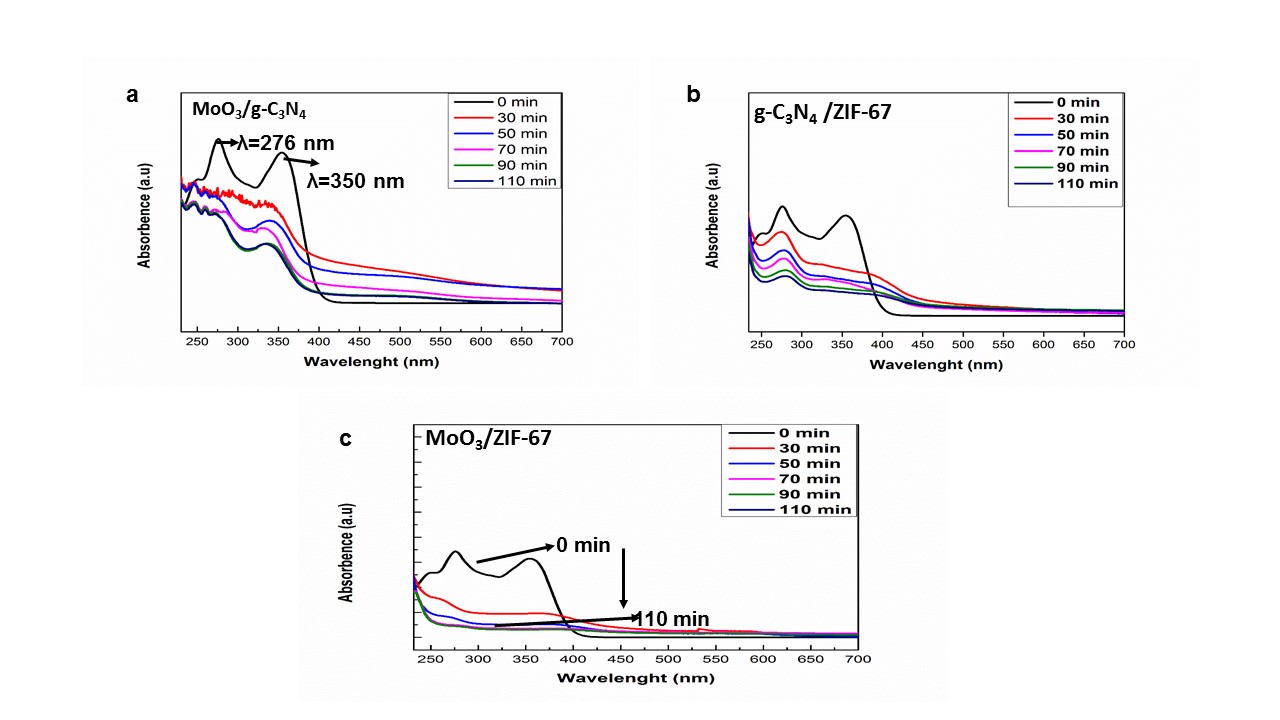


**Fig. S4** Photocatalytic experiments performed with (a) CM (b) CZ and (c) MZ nanohybrids


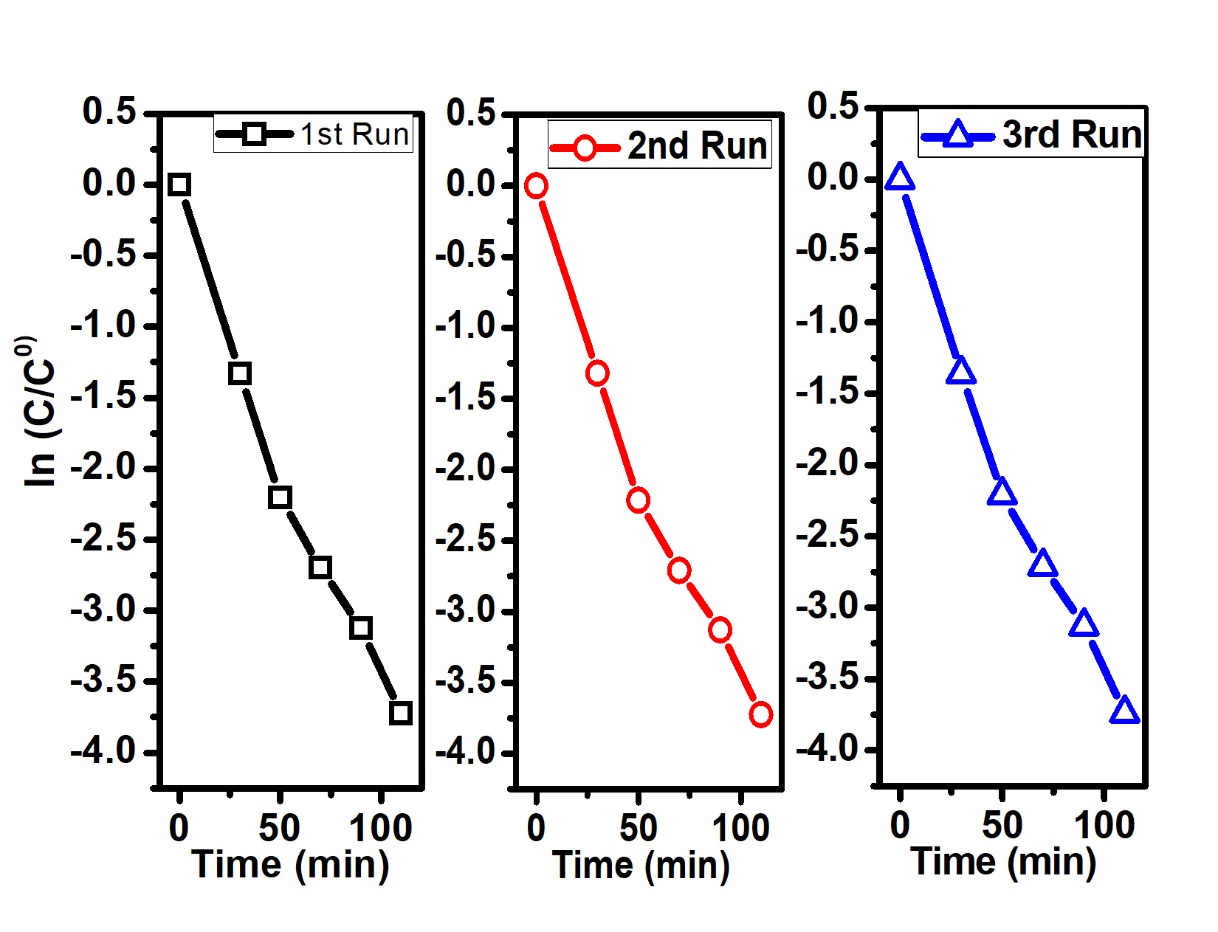


**Fig. S5** Recyclability/Reusability analysis of TC degradation in the presence of CMZ-3 nanohybrid
